# Supplementary material for: IKZF1 and UBR4 gene variants drive autoimmunity and Th2 polarization in IgG4-related disease
Source: PubMed Central journal article supplement (PMC11324302; doi:10.1172/jci178692), 2024-06-13
Supplement: jci-134-178692-s222.pdf [file jci-134-178692-s222.pdf]

## Supplemental Material

### ***IKZF1* and *UBR4* gene variants drive autoimmunity and TH2 polarization in IgG4-related disease**

Qingxiang Liu, Yanyan Zheng, Ines Sturmlechner, Abhinav Jain, Maryam Own, Qiankun Yang, Huimin Zhang, Filippo Pinto e Vairo, Karen Cerosaletti, Jane H. Buckner, Kenneth J. Warrington, Matthew J. Koster, Cornelia M. Weyand, Jörg J. Goronzy

**Figure S1**

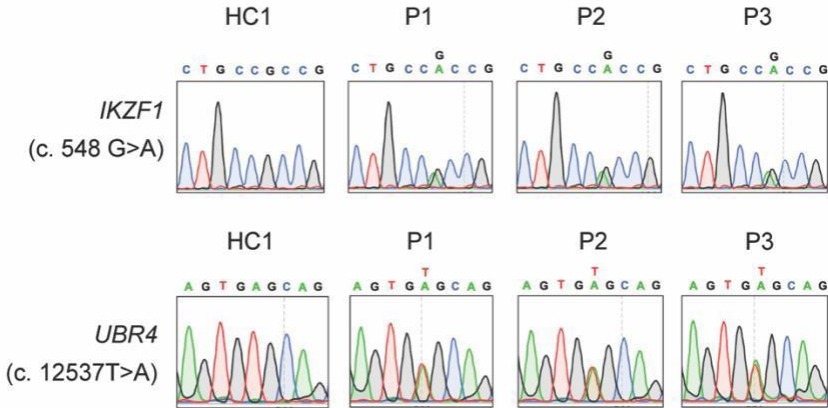

**Figure S1. Sanger sequencing validation of *IKZF1* and *UBR4* variants in the patients.**

Chromatograms from Sanger sequencing from four family members showing the segregation of the G>A variant in *IKZF1* and T>A variant in *UBR4* in the PBMCs of the three affected family members.

**Figure S2**

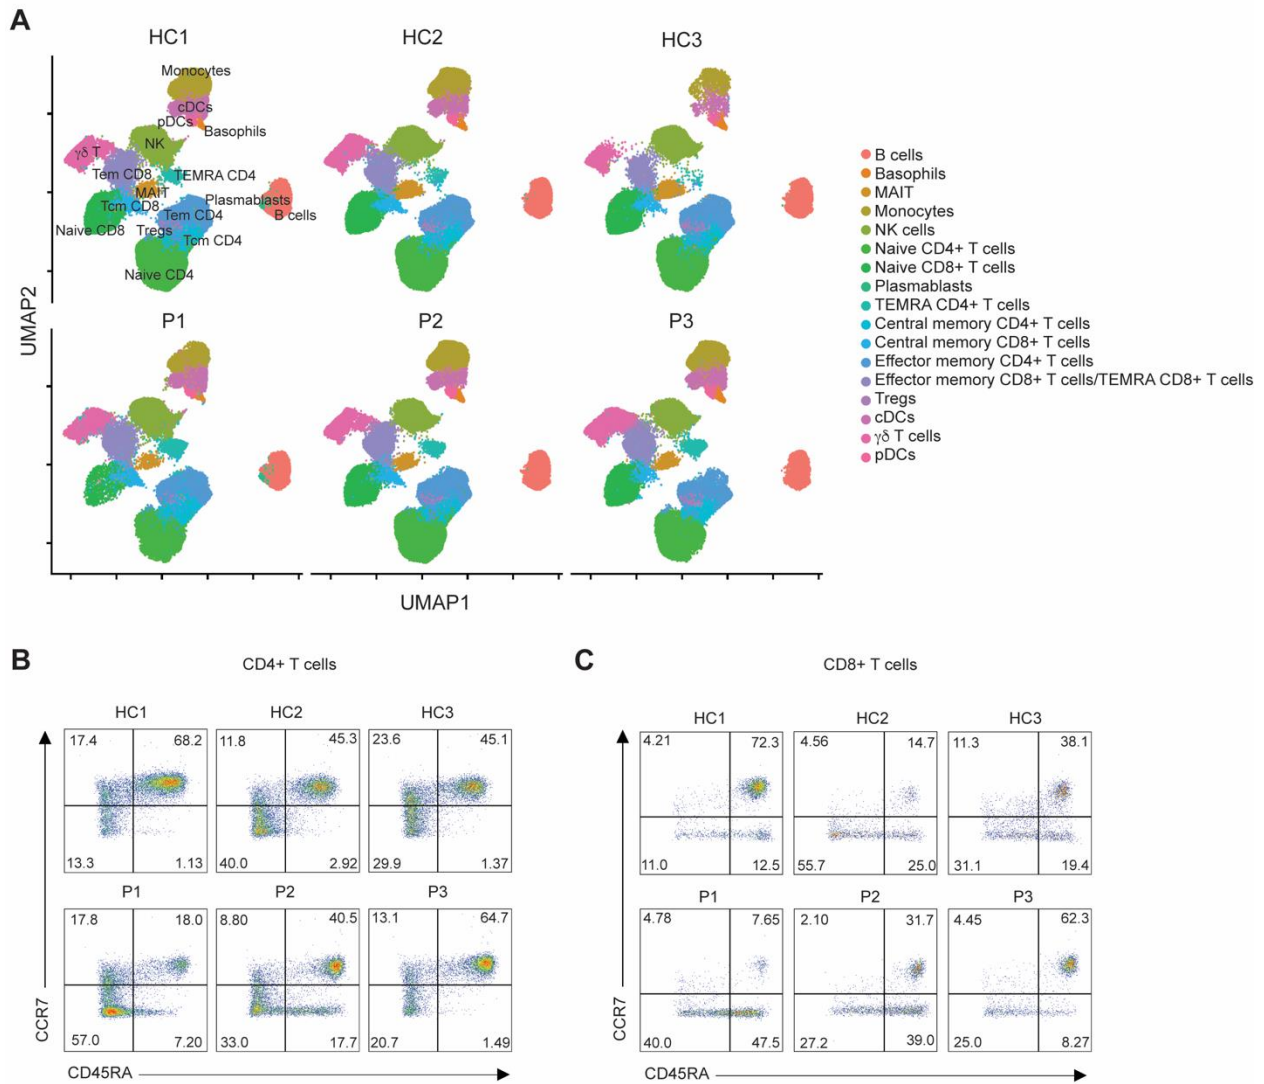

**Figure S2. Phenotyping of PBMCs and T cells from patients and healthy controls.**

(A) UMAP visualization of mass cytometry analysis of individual PBMCs from three healthy controls and three patients.

(B-C) Naïve and memory CD4<sup>+</sup> (B) and CD8<sup>+</sup> (C) T cells frequencies determined by CD45RA and CCR7 expression in individual patients and healthy controls. FACS data from HC1 and P1 (Figure 2C) are shown again in the context of data from additional healthy controls and patients.

**Figure S3**

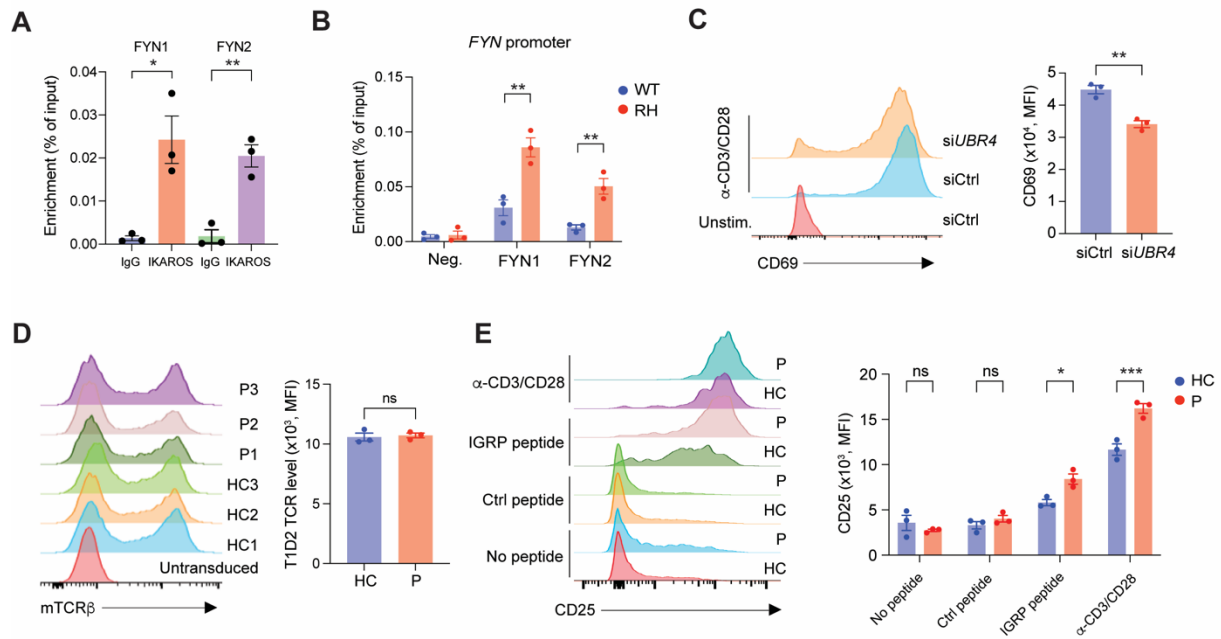

**Figure S3. Synergistic roles of IKAROS and UBR4 in causing FYN hyperactivity.**

(A-B) ChIP-qPCR analysis of IKAROS binding with two *FYN* promoter primer sets. HEK293T cells were transfected with wild type IKAROS (A) or with wild type or with R183H *IKFZ1* variant (B).

(C) CD69 expression measured by flow cytometry on total T cells from healthy individuals transfected with control siRNA or UBR4 siRNA after anti-CD3/CD28 stimulation for 24 hrs.

(D) Flow cytometry analysis of the expression of the T1D2 transgenic islet-specific TCR on T cell blasts from patients and healthy controls after lentiviral transduction using anti-mouse TCR β chain antibody.

(E) CD69 expression after stimulation with no peptide, control peptide, or IGRP peptide-loaded APC measured by flow cytometry of T1D2 TCR transgenic T cells derived from healthy controls (n=3) and patients (n=3). Anti-CD3/CD28 stimulation served as a positive control.

Data are presented as mean ± s.e.m and were analyzed by two-tailed unpaired Student's t-test (A-D) or two-way ANOVA (E). \*P < 0.05, \*\*P < 0.01, \*\*\*P < 0.001. ns, not significant.

**Figure S4**

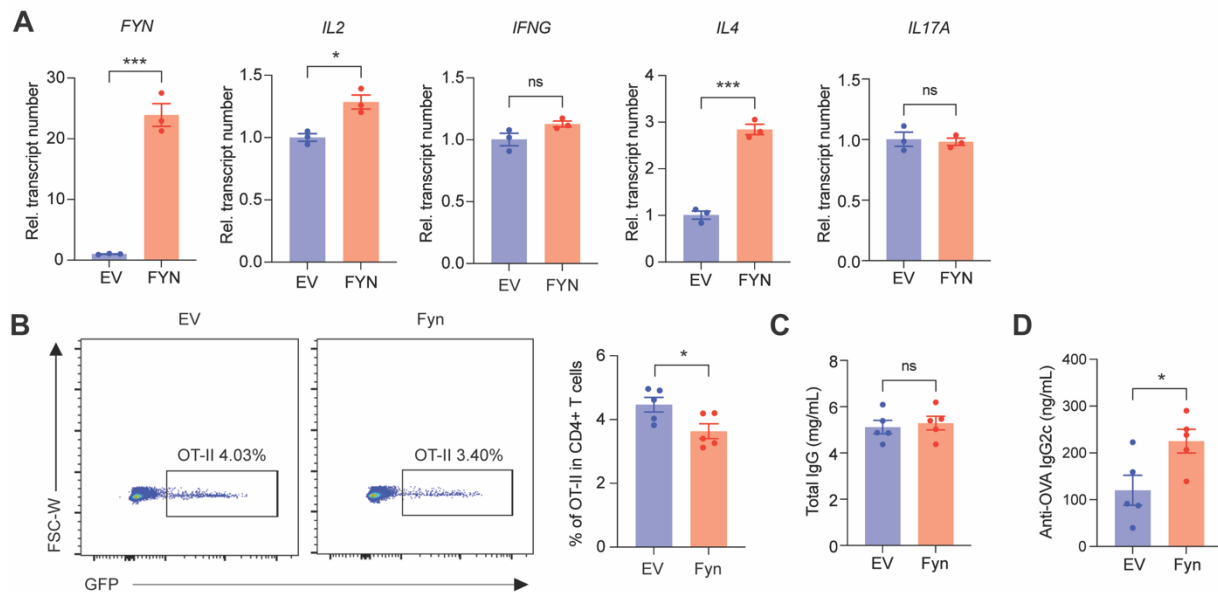

**Figure S4. IKAROS-mediated, increased FYN induces TH2 skewing.**

(A) Naïve CD4 T cells from healthy individuals were lentivirally transduced with empty vector (EV) or vector encoding *FYN*. Cells were cultured on anti-CD3/CD28 coated plates for 2 days under non-polarizing conditions. mRNA expression was analyzed by qRT-PCR.

(B) Flow cytometry analysis of splenocytes of the recipient mice. GFP positive population indicates the transduced, transgenic OT-II cells.

(C-D) Serum total IgG (C) and anti-OVA IgG2c (D) levels were determined by ELISA.

Data are presented as mean  $\pm$  s.e.m and were analyzed by two-tailed unpaired Student's t-test. \*P < 0.05, \*\*\*P < 0.001. ns, not significant.

## Figure S5

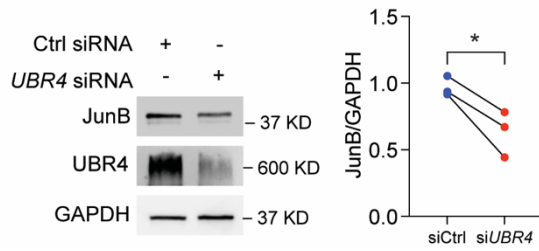

### Figure S5. The effect of UBR4 silencing on JunB abundance.

Immunoblot analysis of total T cells from healthy individuals transfected with control siRNA or *UBR4* siRNA after anti-CD3/CD28 stimulation for 24 h.

Data are presented as mean  $\pm$  s.e.m and were analyzed by two-tailed paired Student's t-test. \*P < 0.05.

**Figure S6**

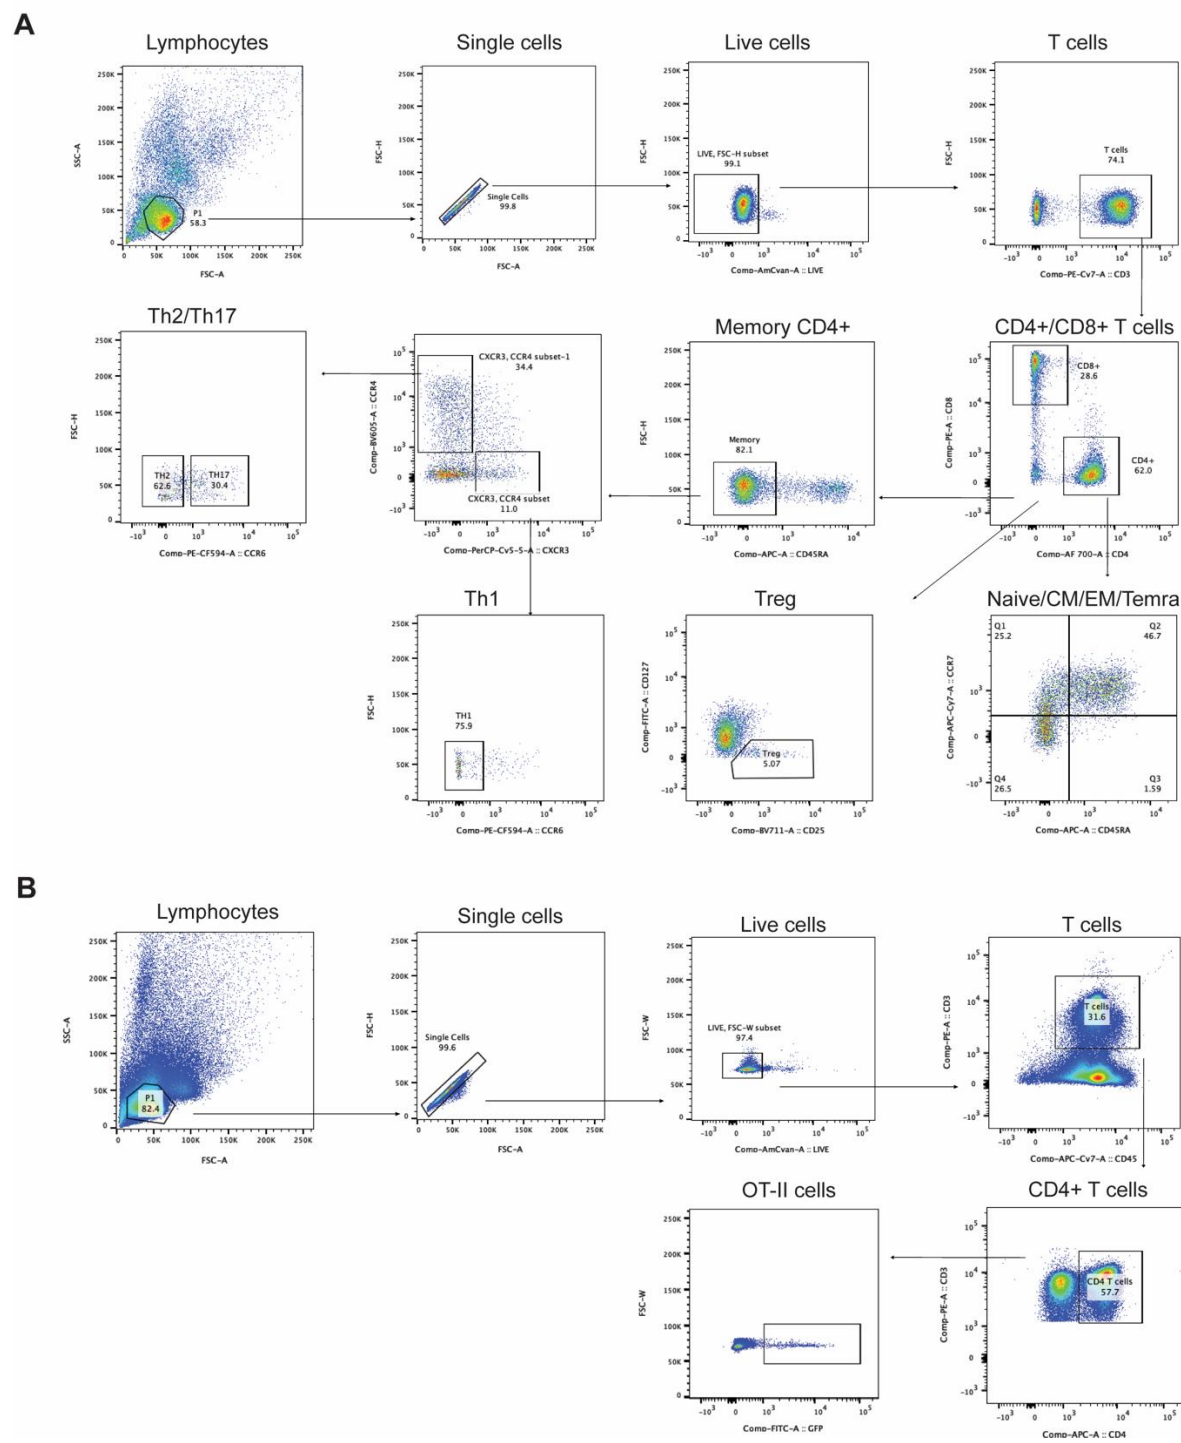

**Figure S6. Gating strategies used in this study.**

(A) Gating strategy for analysis of PBMCs from patients and healthy controls.

(B) Gating strategy for analysis of mouse splenocytes.

**Table S1. Clinical manifestations of the patients**

| Patient                         | Age at first presentation/ evaluation (yrs) | Origin | Autoantibodies                     | Atopy/ allergy                                          | Lymphadenopathy                                                      | Other organ involvement                                        | Treatment                         |
|---------------------------------|---------------------------------------------|--------|------------------------------------|---------------------------------------------------------|----------------------------------------------------------------------|----------------------------------------------------------------|-----------------------------------|
| P1 (Father)                     | 12                                          | Russia | Not available                      | Allergic rhinitis, bronchial wall thickening            | Cervical, right axillary, mediastinal, inguinal                      | Dacryoadenitis orbital masses                                  | Unknown                           |
| P2 (Older daughter, index case) | 17                                          | Russia | Negative ANA, ANCA, RF             | Allergic rhinitis, urticaria, bronchial wall thickening | Neck, chest, abdomen, pelvis, inguinal                               | Dacryoadenitis, pulmonary ground glass opacities /micronodules | Steroids, Azathioprine, Rituximab |
| P3 (Sister)                     | 12                                          | Russia | Negative ANA, RF, dsDNA, ENA, ANCA | Allergic rhinitis, urticaria                            | Cluster of Infra-renal para-aortic lymph nodes with small FDG uptake | None                                                           | Never treated                     |



**Table S2. Laboratory tests**

|                                          | <b>P1</b> | <b>P2</b> | <b>P3</b> |
|------------------------------------------|-----------|-----------|-----------|
| <b>Laboratory test (reference range)</b> |           |           |           |
| IgM mg/dl (45-244)                       | NA        | 83        | 154       |
| IgA mg/dl (52-319)                       | 430       | 578       | 559       |
| IgG total mg/dl (767-1590)               | 1110      | 2100      | 991       |
| IgG1 mg/dl (341-894)                     | NA        | 1210      | NA        |
| IgG2 mg/dl (171-632)                     | NA        | 637       | NA        |
| IgG3 mg/dl (18-106)                      | NA        | 117       | NA        |
| IgG4 (<121 mg/dl)                        | 205       | 486       | 136       |
| IgE kU/L (<214)                          | 2221      | 1247      | 7600      |
| Leukocytes x10 <sup>9</sup> /L           | 9.1       | 8.8       | 12.4      |
| Neutrophils %                            | 50        | 78.2      | 70        |
| Lymphocytes %                            | 35.9      | 7.8       | 21.5      |
| Eosinophils %                            | 5.8       | 4.7       | 1.7       |
| Hemoglobin g/dl                          | 14.9      | 12.6      | 13.7      |
| Platelet x10 <sup>9</sup> /L             | 236       | 352       | 333       |

**Red** denotes abnormal laboratory values. **Black** denotes laboratory values within the normal reference range. NA: not assessed.

**Table S3. CyTOF antibody panel**

| <b>Target</b> | <b>Clone</b> | <b>Metal</b> | <b>Supplier</b> | <b>Catalog #</b> |
|---------------|--------------|--------------|-----------------|------------------|
| CD45          | HI30         | 89Y          | Fluidigm        | S3089003C        |
| CD196/CCR6    | G034E3       | 141Pr        | Fluidigm        | S3141003C        |
| CD19          | HIB19        | 142Nd        | Fluidigm        | S3142001C        |
| CD127/IL-7Ra  | A019D5       | 143Nd        | Fluidigm        | S3143012C        |
| CD38          | HIT2         | 144Nd        | Fluidigm        | S3144014C        |
| IgD           | IA6-2        | 146Nd        | Fluidigm        | S3146005C        |
| CD11c         | Bu15         | 147Sm        | Fluidigm        | S3147008C        |
| CD16          | 3G8          | 148Nd        | Fluidigm        | S3148004C        |
| CD194/CCR4    | L291H4       | 149Sm        | Fluidigm        | S3149029C        |
| CD123/IL-3R   | 6H6          | 151Eu        | Fluidigm        | S3151001C        |
| TCRgd         | 11F2         | 152Sm        | Fluidigm        | S3152008C        |
| CD185/CXCR5   | RF8B2        | 153Eu        | Fluidigm        | S3153020C        |
| CD3           | UCHT1        | 154Sm        | Fluidigm        | S3154003C        |
| CD45RA        | HI100        | 155Gd        | Fluidigm        | S3155011C        |
| CD27          | L128         | 158Gd        | Fluidigm        | S3158010C        |
| CD28          | CD28.2       | 160Gd        | Fluidigm        | S3160003C        |
| CD66b         | 80H3         | 162Dy        | Fluidigm        | S3162023C        |
| CD183/CXCR3   | G043H7       | 163Dy        | Fluidigm        | S3163004C        |
| CD161         | HP-3G10      | 164Dy        | Fluidigm        | S3164009C        |
| CD45RO        | UCHL1        | 165Ho        | Fluidigm        | S3165011C        |
| CD24          | ML5          | 166Er        | Fluidigm        | S3166007C        |
| CD197/CCR7    | G043h7       | 167Er        | Fluidigm        | S3167009C        |
| CD8           | SK1          | 168Er        | Fluidigm        | S3168002C        |
| CD25          | 2A3          | 169Tm        | Fluidigm        | S3169003C        |
| CD20          | 2H7          | 171Yb        | Fluidigm        | S3171012C        |
| HLA-DR        | L243         | 173Yb        | Fluidigm        | S3173005C        |
| CD4           | SK3          | 174Yb        | Fluidigm        | S3174004C        |
| CD14          | M5E2         | 175Lu        | Fluidigm        | S3175015C        |
| CD56/NCAM     | NCAM16.2     | 176Yb        | Fluidigm        | S3176008C        |

**Table S4. Antibodies for flow cytometry and immunoblotting**

| Antibody name                               | Clone       | Supplier       | Catalog #  | Application       |
|---------------------------------------------|-------------|----------------|------------|-------------------|
| Anti-human CD3 PE-Cy7                       | SK7         | BioLegend      | 300419     | Flow cytometry    |
| Anti-human CD4 AF700                        | SK3         | BioLegend      | 317426     | Flow cytometry    |
| Anti-human CD8 PE                           | SK1         | BioLegend      | 980902     | Flow cytometry    |
| Anti-human CCR7 AF750                       | G043H7      | BioLegend      | 353245     | Flow cytometry    |
| Anti-human CD127 FITC                       | A019D5      | BioLegend      | 351311     | Flow cytometry    |
| Anti-human CD25 BV711                       | BC96        | BioLegend      | 302635     | Flow cytometry    |
| Anti-human CXCR3 PerCP-Cy5.5                | G025H7      | BioLegend      | 353714     | Flow cytometry    |
| Anti-human CXCR5 BV421                      | J252D4      | BioLegend      | 356919     | Flow cytometry    |
| Anti-human CCR4 BV605                       | L291H4      | BioLegend      | 359417     | Flow cytometry    |
| Anti-human CCR6 PE-CF594                    | G034E3      | BioLegend      | 353429     | Flow cytometry    |
| Anti-human CD45 APC                         | HI130       | BioLegend      | 304011     | Flow cytometry    |
| Anti-human CD45RA APC                       | HI100       | BioLegend      | 304112     | Flow cytometry    |
| Anti-phospho-ERK AF488                      | 20A         | BD             | 612592     | Flow cytometry    |
| Anti-human CD69 APC                         | FN50        | BioLegend      | 310910     | Flow cytometry    |
| Anti-human CD25 BV711                       | BC96        | BioLegend      | 302635     | Flow cytometry    |
| Anti-phospho-SYK Y525/526 AF647             | C87C1       | Cell Signaling | 12081      | Flow cytometry    |
| Anti-human IL-4 PE                          | 8D4-8       | Invitrogen     | 12-7049-41 | Flow cytometry    |
| Anti-mouse IL-4 BV711                       | 11B11       | BioLegend      | 504133     | Flow cytometry    |
| Anti-mouse IFN $\gamma$ PE-Cy7              | XMG1.2      | BD             | 557649     | Flow cytometry    |
| Anti-mouse TCR $\beta$ chain PerCP-Cy5.5    | H57-597     | BioLegend      | 109227     | Flow cytometry    |
| Anti-CD45                                   | D9M8I       | Cell Signaling | 13917      | Immunoblot        |
| Anti-Phospho-LCK Y394                       | 755103      | R&D Systems    | MAB7500    | Immunoblot        |
| Anti-Phospho-LCK Y505                       | Polyclonal  | Cell Signaling | 2751       | Immunoblot        |
| Anti-LCK                                    | Polyclonal  | Cell Signaling | 2752       | Immunoblot        |
| Anti-CSK                                    | C74C1       | Cell Signaling | 4980       | Immunoblot        |
| Anti-Phospho-ZAP70 Y319                     | 65E4        | Cell Signaling | 2717       | Immunoblot        |
| Anti-ZAP70                                  | 99F2        | Cell Signaling | 2705       | Immunoblot        |
| Anti-NUR77                                  | EPR23982-85 | Abcam          | ab283264   | Immunoblot        |
| Anti-LYN                                    | C13F9       | Cell Signaling | 2796       | Immunoblot        |
| Anti-FYN                                    | Polyclonal  | Cell Signaling | 4023       | Immunoblot        |
| Anti-FYN                                    | 1S          | Invitrogen     | MA5-13134  | Co-IP             |
| Anti-Phospho-SRC Y527                       | Polyclonal  | Cell Signaling | 2105       | Immunoblot        |
| Anti-IKAROS                                 | D10E5       | Cell Signaling | 9034       | Immunoblot, ChIP  |
| Anti-UBR4                                   | Polyclonal  | Abcam          | Ab86738    | Immunoblot        |
| Anti-Phospho-ERK                            | D13.14.4E   | Cell Signaling | 4370       | Immunoblot        |
| Anti-ERK                                    | 137F5       | Cell Signaling | 4695       | Immunoblot        |
| Anti-His tag                                | Polyclonal  | Cell Signaling | 2365       | Immunoblot        |
| Anti-JunB                                   | C37F9       | Cell Signaling | 3753       | Immunoblot, co-IP |
| Anti-Ubiquitin HRP                          | P4D1        | Cell Signaling | 14049      | Immunoblot        |
| Anti-GAPDH                                  | D16H11      | Cell Signaling | 8884       | Immunoblot        |
| Anti- $\beta$ -actin HRP                    | 8H10D10     | Cell Signaling | 12262      | Immunoblot        |
| Anti-Rabbit IgG HRP                         | Polyclonal  | Cell Signaling | 7074       | Immunoblot        |
| Anti-Rabbit IgG (Confirmation specific) HRP | L27A9       | Cell Signaling | 5127       | Immunoblot        |

**Table S5. Primers for qRT-PCR**

| <b>Name</b> | <b>Sequence (5'-3')</b>  |
|-------------|--------------------------|
| PTPRC-F     | CTTCAGTGGTCCCATTGTGGTG   |
| PTPRC-R     | CCACTTTGTTCTCGGCTTCCAG   |
| FYN-F       | ATGGGCTGTGTGCAATGTAAG    |
| FYN-R       | GAAGCTGGGGTAGTGCTGAG     |
| TBX21-F     | CGGATGTTCCCATTCCCTGTC    |
| TBX21-R     | TTCCACACTGCACCCACTTG     |
| GATA3-F     | GCCCCCTCATTAAGCCCAAG     |
| GATA3-R     | TTGTGGTGGTCTGACAGTTCCG   |
| RORC-F      | TGCCAGAATGACCAGATTGTG    |
| RORC-R      | ATGCCACCGTATTTGCCTTC     |
| FOXP3-F     | CAGCCATGATCAGCCTCACA     |
| FOXP3-R     | CACTGGGATTTGGGAAGGTG     |
| IFNG-F      | ACTAGGCAGCCAACCTAAGCAAGA |
| IFNG-R      | CATCAGGGTCACCTGACACATTCA |
| IL4-F       | CCAAGTCTTCCCCCTCTG       |
| IL4-R       | TCTGTTACGGTCAACTCGGTG    |
| IL2-F       | AGAAGTCAAACCTCTGGAGGAAG  |
| IL2-R       | GCTGTCTCAGCATATTCACAC    |
| IL5-F       | TGGAGCTGCCTACGTGTATG     |
| IL5-R       | TTCGATGAGTAGAAAGCAGTGC   |
| IL13-F      | CCTCATGGCGCTTTTGTGAC     |
| IL13-R      | TCTGGTTCTGGGTGATGTTGA    |
| IL17A-F     | TCCCACGAAATCCAGGATGC     |
| IL17A-R     | GGATGTTCAAGTTGACCATCAC   |
| RPL13A-F    | GCCATCGTGGCTAACAGGTA     |
| RPL13A-R    | GTTGGTGTTCATCCGCTTGC     |
| Il4-F       | GGTCTCAACCCCCAGCTAGT     |
| Il4-R       | GCCGATGATCTCTCTCAAGTGAT  |
| Il13-F      | CCTGGCTCTTGCTTGCCTT      |
| Il13-R      | GGTCTTGTGTGATGTTGCTCA    |
| Gata3-F     | CTCGGCCATTTCGTACATGGAA   |
| Gata3-R     | GGATACCTCTGCACCGTAGC     |
| Gapdh-F     | AGGTCGGTGTGAACGGATTTG    |
| Gapdh-R     | TGTAGACCATGTAGTTGAGGTCA  |
